# Supplementary material for: Ultraviolet irradiation sensitizes Pseudomonas aeruginosa PAO1 to multiple antibiotics
Source: Royal Society of Chemistry journal article supplement (doi:10.1039/c8ew00293b), 2018-01-01
Supplement: c8ew00293b1.pdf [file c8ew00293b1.pdf]

1 **Supplementary Material for “Ultraviolet irradiation sensitizes *Pseudomonas***

2 ***aeruginosa* PAO1 to multiple antibiotics”**

3

4 Fuzheng Zhao, Qing Hu, Hongqiang Ren, Xu-Xiang Zhang\*

5

6 *State Key Laboratory of Pollution Control and Resource Reuse, School of the*

7 *Environment, Nanjing University, Nanjing 210023, China*

8

9 \*Corresponding author: [zhangxx@nju.edu.cn](mailto:zhangxx@nju.edu.cn) (X.-X. Zhang)

---

10 **Text S1: R scripts for calculating MICs**

```
11 for (i in 1:ncol(inhibitionrate.df))
12 {
13     DIR.df <- data.frame (dose = dose[,i], ir = inhibitionrate[,i])
14     prepDIRdat <- prepDRdat (drMat = DIR.df, alpha = 0.05, fitCtr=T,
15     standardize=T) $ dat
16     args_hill <- hillFit (d = prepDIRdat$dose, y = prepDIRdat$response)
17     E0 <- args_hill [1]
18     Einf <- args_hill [2]
19     EC50 <- args_hill [3]
20     HS <- args_hill [4]
21     MIC[,i] <- (((0.9-Einf)/(E0-0.9))^HS)*EC50
22 }
```
